# Supplementary material
Source: PubMed Central journal article supplement (PMC359432)
Supplement: cmaj_170_6_976_v2_1.pdf [file cmaj_170_6_976_v2_1.pdf]

# Interventions visant à promouvoir l'allaitement maternel : application des données probantes à la pratique clinique

Valerie A. Palda, Jeanne-Marie Guise, C. Nadine Wathen, avec le Groupe d'étude canadien sur les soins de santé préventifs

Dans ce document, le Groupe d'étude canadien sur les soins de santé préventifs (GECSSP) met à jour ses recommandations antérieures sur l'allaitement maternel<sup>1</sup> en présentant des données probantes sur des interventions qui améliorent les taux d'allaitement ou en prolongent la durée (ou les deux). Il a été prouvé à la fois dans les pays en développement et dans les pays industrialisés que l'allaitement maternel améliore l'état de santé des nourrissons et de leur mère, ce qui en fait la façon optimale de nourrir les nouveau-nés<sup>2,3</sup>. Même si la prévalence de l'allaitement maternel a augmenté au Canada, où plus de trois quarts des mères pensent maintenant à allaiter, l'allaitement ne dure pas aussi longtemps que le recommande l'Organisation mondiale de la santé (OMS), soit allaitement seulement pendant six mois et allaitement partiel pendant jusqu'à deux ans<sup>4,5</sup>. Des données canadiennes récentes indiquent que 22 % des nouvelles mères âgées de 15 à 49 ans allaitent pendant moins de trois mois et 35 % le font pendant au moins trois mois<sup>6</sup>. Cet arrêt prématuré découle bien plus de la difficulté que pose l'allaitement, y compris le manque d'information et d'appui, que du choix des femmes<sup>7</sup>. En fait, le nombre d'hôpitaux canadiens que l'on pourrait reconnaître comme «amis des bébés» selon les critères de l'OMS et de l'UNICEF<sup>8</sup> s'établissait à 5 sur les 523 hôpitaux qui ont répondu à une enquête de 1993<sup>9</sup>. Selon l'UNICEF, un seul hôpital avait cette désignation en 2002<sup>10</sup>.

Dans le contexte d'un projet conjoint, le GECSSP et le Groupe de travail sur les services de prévention des États-Unis ont étudié systématiquement les résultats d'études randomisées pour déterminer l'efficacité de toutes les interventions de counselling qui commencent dans le cabinet d'un clinicien (comme les groupes d'entraide avant et après l'accouchement, l'éducation, l'appui téléphonique ou les mères-conseils) pour augmenter les taux d'allaitement ou en prolonger la durée<sup>11,12</sup>. Nous présentons ici les nouvelles recommandations du GECSSP fondées sur l'étude systématique conjointe, ainsi que sur une étude canadienne clé<sup>13</sup> publiée après cette étude systématique et axée sur le con-

texte des soins de santé au Canada (Tableau 1). Les définitions de la qualité des preuves et des catégories des recommandations utilisées dans le Tableau 1 sont disponibles dans une annexe de cet article affichée en ligne ([www.cmaj.ca/cgi/content/full/170/6/976/DC1](http://www.cmaj.ca/cgi/content/full/170/6/976/DC1)).

Les interventions consistant en une éducation structurée sur l'allaitement maternel donnée avant l'accouchement réussissent à améliorer à la fois le nombre de mères qui choisissent d'allaiter et le maintien de l'allaitement pendant les deux premiers mois suivant l'accouchement, comparativement aux soins habituels<sup>14-28</sup>. Ces interventions, comportant une formation individuelle ou en groupe portant sur la connaissance de l'allaitement maternel, les techniques pratiques et la solution de problèmes, se sont révélées efficaces lorsque des spécialistes de l'allaitement ou des infirmières s'en sont chargées et des séances autant uniques que multiples se sont révélées efficaces. L'appui téléphonique ou en personne donné après l'accouchement par des spécialistes de l'allaitement, des infirmières ou des conseillères peut améliorer l'efficacité de ces interventions. En outre, le recours aux services de conseillères a amélioré les taux et la durée de l'allaitement et ces types de programmes peuvent représenter une solution de rechange rentable aux services assurés par des professionnels, particulièrement à des endroits ou dans des contextes où les services professionnels sont rares ou non disponibles<sup>13,20,29-32</sup>. Le GECSSP se prononce contre le recours aux documents écrits (qui n'ont pas prouvé leur efficacité lorsqu'on les utilise seuls<sup>16,19,22,26,33-36</sup> même s'ils ne causent aucun méfait démontré) et la distribution aux nouvelles mères à leur sortie de l'hôpital de préparations commerciales (ce qui a démontré réduire les taux d'allaitement)<sup>37</sup>. On n'a malheureusement pas évalué suffisamment les conseils du principal clinicien d'une femme (médecin de famille, obstétricien ou sage-femme) et la recherche révèle qu'il y a des lacunes à cet égard.

Les recommandations présentées ici (Tableau 1) ne portent pas sur les avantages cliniques de l'allaitement maternel, démontrés selon le GECSSP par ses recom-

mandations antérieures sur l'allaitement<sup>1</sup>. Nous avons plutôt cherché à recommander surtout des interventions qui modifient l'adoption initiale de l'allaitement et sa durée.

La Société canadienne de pédiatrie, Les diététistes du Canada et Santé Canada ont recommandé l'allaitement maternel exclusif pendant au moins les quatre premiers mois et ensuite le maintien de l'allaitement conjugué à des

**Tableau 1 : Recommandations du Groupe d'étude canadien sur les soins de santé préventifs au sujet des interventions visant à promouvoir l'allaitement maternel**

| Intervention                                                                                                                          | Efficacité                                                                                                                                                                                                                                                                                                                                                                                                                                                                                                                                                        | Qualité des preuves*                                                                                                                                                                                                  | Recommandation*                                                                                                                                                                                                                                          |
|---------------------------------------------------------------------------------------------------------------------------------------|-------------------------------------------------------------------------------------------------------------------------------------------------------------------------------------------------------------------------------------------------------------------------------------------------------------------------------------------------------------------------------------------------------------------------------------------------------------------------------------------------------------------------------------------------------------------|-----------------------------------------------------------------------------------------------------------------------------------------------------------------------------------------------------------------------|----------------------------------------------------------------------------------------------------------------------------------------------------------------------------------------------------------------------------------------------------------|
| Programmes d'éducation et appui après l'accouchement pour promouvoir l'allaitement <sup>†</sup>                                       | L'information structurée sur l'allaitement maternel donnée avant l'accouchement améliore à la fois la décision d'allaiter et la durée de l'allaitement à court terme après l'accouchement, comparativement aux soins habituels <sup>‡</sup><br><br>L'appui en personne ou par téléphone renforce l'effet de l'éducation et entraîne une augmentation de 5 à 10 % de la décision d'allaiter et de la durée de l'allaitement à court terme<br><br>L'appui en personne ou par téléphone peut en soi augmenter, à court terme et à long terme, les taux d'allaitement | <i>Éducation</i><br>Niveau I — Moyen <sup>14-19</sup><br>Niveau I — Médiocre <sup>20-24</sup><br><br><i>Éducation + soutien</i><br>Niveau I — Moyen <sup>15,18,19,25-27</sup><br>Niveau I — Médiocre <sup>20,28</sup> | De bonnes données probantes incitent à recommander la prestation de programmes structurés d'éducation avant l'accouchement et de soutien après l'accouchement <sup>1</sup> pour promouvoir l'allaitement maternel et sa durée<br><b>Recommandation A</b> |
| Counselling par des pairs pour promouvoir l'allaitement                                                                               | Les conseillères peuvent avoir un effet important sur le taux d'allaitement et leur durée                                                                                                                                                                                                                                                                                                                                                                                                                                                                         | Niveau I — Moyen <sup>13</sup><br>Niveau I — Médiocre <sup>20</sup><br>Niveau II-1 — Médiocre <sup>29-32</sup>                                                                                                        | Des données probantes moyennes incitent à recommander le counselling par des pairs pour promouvoir la décision d'allaiter et la durée de l'allaitement<br><b>Recommandation B</b>                                                                        |
| Distribution aux nouvelles mères de documents écrits pour promouvoir l'allaitement                                                    | Les documents écrits n'offrent aucun avantage à eux seuls                                                                                                                                                                                                                                                                                                                                                                                                                                                                                                         | Niveau I — Bon <sup>33</sup><br>Niveau I — Moyen <sup>16,19,26</sup><br>Niveau I — Médiocre <sup>22,34-36</sup>                                                                                                       | De bonnes données probantes incitent à recommander de ne pas distribuer de documents écrits seulement pour promouvoir l'allaitement maternel<br><b>Recommandation D</b>                                                                                  |
| Conseils des prestataires de soins primaires (médecin ou sage-femme) aux futures ou aux nouvelles mères pour promouvoir l'allaitement | Efficacité inconnue                                                                                                                                                                                                                                                                                                                                                                                                                                                                                                                                               | On n'a trouvé aucune étude                                                                                                                                                                                            | Il n'y a pas suffisamment de données probantes pour formuler une recommandation au sujet des conseils donnés par des prestataires de soins de santé primaires afin de promouvoir l'allaitement<br><b>Recommandation I</b>                                |
| Distribution de préparations commerciales aux nouvelles mères au moment de leur sortie d'hôpital                                      | Les femmes qui recevaient des préparations commerciales au moment de leur sortie d'hôpital allaitaient moins que celles qui n'en recevaient pas                                                                                                                                                                                                                                                                                                                                                                                                                   | Niveau I (analyse systématique) — Bon <sup>37</sup>                                                                                                                                                                   | De bonnes données probantes incitent à recommander de ne pas distribuer de préparations commerciales aux nouvelles mères<br><b>Recommandation E</b>                                                                                                      |
| Cohabitation et contact rapide de l'enfant avec la mère pour promouvoir l'allaitement                                                 | La seule étude nouvelle sur la cohabitation incluait de multiples interventions et l'on n'a pu tirer de conclusions<br><br>Les nouvelles données concernant le contact rapide avec la mère sont insuffisantes                                                                                                                                                                                                                                                                                                                                                     | <i>Cohabitation</i><br>Niveau I (une seule étude) — Moyenne <sup>38</sup><br><i>Contact rapide avec la mère</i><br>Niveau I (méta-analyse) — Bon <sup>39-42</sup>                                                     | De bonnes données probantes incitent à recommander la cohabitation et le contact rapide de l'enfant avec la mère pour promouvoir l'allaitement<br><b>Recommandation A<sup>‡</sup></b>                                                                    |

\*Les définitions de la qualité des données probantes et des catégories de recommandations utilisées par le Groupe d'étude canadien sur les soins de santé préventifs sont disponibles dans une annexe en ligne, à [www.cmaj.ca/cgi/content/full/170/6/976/DC1](http://www.cmaj.ca/cgi/content/full/170/6/976/DC1).

<sup>†</sup>Dans les études analysées, ces interventions étaient habituellement fournies dans le contexte clinique par des spécialistes de l'allaitement ou des infirmières et consistaient en des consignes individuelles ou collectives sur les connaissances relatives à l'allaitement, les techniques pratiques et les techniques de solution de problèmes.

<sup>‡</sup>Dans les recommandations de 1994 du GECSSP<sup>1</sup>, on passait en revue de «bonnes» données probantes de niveau I. Les données probantes analysées ici n'annulent pas ces recommandations classées comme recommandations de catégorie A.

aliments complémentaires jusqu'à l'âge de deux ans et plus<sup>43</sup>. L'American Academy of Pediatrics a recommandé l'allaitement exclusif pendant environ les six premiers mois et l'allaitement continu pendant au moins 12 mois et plus, c'est-à-dire aussi longtemps que la mère et l'enfant le souhaitent<sup>44</sup>. Des groupes recommandent aussi de fournir des moyens d'appui individuels et systémiques adéquats comme ceux que l'on recommande dans l'Initiative des hôpitaux amis des bébés<sup>8</sup>.

Cet article a fait l'objet d'un examen critique par des pairs.

Département de médecine, Hôpital St. Michael's, Toronto (Ont.) (Palda); Département d'obstétrique et gynécologie et Département d'informatique médicale et recherche sur les résultats, Oregon Health and Science University, Portland (Oregon) (Guise); et Centre Offord d'études de l'enfance, Université McMaster, Hamilton (Ont.) (Wathen).

Intérêts concurrents : Aucun déclaré.

Contributeurs : Valerie Palda a étudié les données probantes et rédigé les recommandations et le présent commentaire. Jeanne-Marie Guise et Nadine Wathen ont étudié les données probantes et rédigé les recommandations, soumis l'article courant à une révision critique et étudié les révisions subséquentes. Le Groupe d'étude canadien sur les soins de santé préventifs a soumis les données probantes à un examen critique et élaboré les recommandations conformément à ses méthodologies et à son processus de dégagement de consensus. Le Groupe d'étude canadien sur les soins de santé préventifs est un groupe indépendant financé par Santé Canada.

## Références

1. Wang EEL. Allaitement maternel. Dans : Groupe d'étude canadien sur l'examen médical périodique. *Le Guide canadien de médecine clinique préventive*. Ottawa : Santé Canada; 1994. p. 262-74.
2. Kramer MS, Chalmers B, Hodnett ED, Sevkovskaya Z, Dzikovich I, Shapiro S, et al. Promotion of Breastfeeding Intervention Trial (PROBIT): a randomized trial in the Republic of Belarus. *JAMA* 2001;285(4):413-20.
3. Collaborative Group on Hormonal Factors in Breast Cancer. Breast cancer and breastfeeding: collaborative reanalysis of individual data from 47 epidemiological studies in 30 countries, including 50302 women with breast cancer and 96973 women without the disease. *Lancet* 2002;360(9328):187-95.
4. Organisation mondiale de la santé. *The optimal duration of exclusive breastfeeding: report of an expert consultation*. Genève : L'Organisation; 2002. Disponible à : [www.who.int/nut/documents/optimal\\_duration\\_of\\_exc\\_bfeeding\\_report\\_eng.pdf](http://www.who.int/nut/documents/optimal_duration_of_exc_bfeeding_report_eng.pdf) (consulté le 6 février 2004).
5. Organisation mondiale de la santé. *Stratégie mondiale pour l'alimentation du nourrisson et du jeune enfant*. Genève : L'Organisation; 2003. Disponible à : [www.who.int/nut/documents/gis\\_infant\\_feeding\\_text\\_fre.pdf](http://www.who.int/nut/documents/gis_infant_feeding_text_fre.pdf) (consulté le 16 février 2004).
6. Allaitement maternel. *Indicateurs de la santé* [série en ligne] 2002;2002(1). Ottawa : Statistique Canada; mai 2002. No 82-221-XIF au catalogue. Disponible à : [www.statcan.ca/francais/freepub/82-221-XIF/00502/high/canada/cbreast-f.htm](http://www.statcan.ca/francais/freepub/82-221-XIF/00502/high/canada/cbreast-f.htm) (consulté le 19 février 2004).
7. Barber CM, Abernathy T, Steinmetz B, Charlebois J. Using a breastfeeding prevalence survey to identify a population for targeted programs. *R can santé publique* 1997;88(4):242-5.
8. Organisation mondiale de la santé. *Données scientifiques relatives aux dix conditions pour le succès de l'allaitement*. Genève : L'Organisation; 1998. Disponible à : [www.who.int/child-adolescent-health/New\\_Publications/NUTRITION/WHO\\_CHD\\_98.9-fr.pdf](http://www.who.int/child-adolescent-health/New_Publications/NUTRITION/WHO_CHD_98.9-fr.pdf) (consulté le 16 février 2004).
9. Dunlop M. Few Canadian hospitals qualify for «Baby Friendly» designation by promoting breast-feeding: survey. *JAMC* 1995;152(1):87-9.
10. Current status of baby-friendly hospital initiative: March 2002 [tableau en ligne]. New York : UNICEF; 2002. Disponible à : [www.unicef.org/programme/breastfeeding/assets/statusbfhi.pdf](http://www.unicef.org/programme/breastfeeding/assets/statusbfhi.pdf) (consulté le 16 février 2004).
11. Guise JM, Palda V, Westhoff C, Chan BKS, Helfand M, Lieu TA. The effectiveness of primary care-based interventions to promote breastfeeding: systematic evidence review and meta-analysis for the US Preventive Services Task Force. *Ann Fam Med* 2003;1:70-8.
12. Palda VA, Guise JM, Wathen CN, Groupe d'étude canadien sur les soins de santé préventifs. Interventions to promote breastfeeding: updated recommendations from the Canadian Task Force on Preventive Health Care. Rap. tech. 03-6 du GECSSP. London (Ont.) : Groupe d'étude canadien sur les soins de santé préventifs; octobre 2003.
13. Dennis CL, Hodnett E, Gallop R, Chalmers B. The effect of peer support on breast-feeding duration among primiparous women: a randomized controlled trial. *JAMC* 2002;166(1):21-8.
14. Duffy EP, Percival P, Kershaw E. Positive effects of an antenatal group teaching session on postnatal nipple pain, nipple trauma and breastfeeding rates. *Midwifery* 1997;13(4):189-96.
15. Pugh LC, Milligan RA. Nursing intervention to increase the duration of breastfeeding. *Appl Nurs Res* 1998;11(4):190-4.
16. Hill PD. Effects of education on breastfeeding success. *Matern Child Nurs J* 1987;16(2):145-56.
17. Kistin N, Benton D, Rao S. Breastfeeding rates among black urban low income women: effect of prenatal education. *Pediatrics* 1990;86:741-6.
18. Brent NB, Redd B, Dworetz A, D'Amico F, Greenberg JJ. Breast-feeding in a low-income population. Program to increase incidence and duration. *Arch Pediatr Adolesc Med* 1995;149(7):798-803.
19. Redman S, Watkins J, Evans L, Lloyd D. Evaluation of an Australian intervention to encourage breastfeeding in primiparous women. *Health Promot Int* 1995;10(2):101-13.
20. Sciacca JP, Dube DA, Phipps BL, Ratliff MI. A breastfeeding education and promotion program: effects on knowledge, attitudes, and support for breastfeeding. *J Community Health* 1995;20(6):473-90.
21. McEnery G, Rao KP. The effectiveness of antenatal education of Pakistani and Indian women living in this country. *Child Care Health Dev* 1986;12(6):385-99.
22. Rossiter JC. The effect of a culture-specific education program to promote breastfeeding among Vietnamese women in Sydney. *Int J Nurs Stud* 1994;31(4):369-79.
23. Wiles LS. The effect of prenatal breastfeeding education on breastfeeding success and maternal perception of the infant. *JOGN Nurs* 1984;13(4):253-7.
24. Reifsnider E, Eckhart D. Prenatal breastfeeding education: its effect on breastfeeding among WIC participants. *J Hum Lact* 1997;13(2):121-5.
25. Oakley A, Rajan L. Social support and pregnancy outcome. *Br J Obstet Gynaecol* 1990;97:155-62.
26. Frank DA, Wirtz SJ, Sorenson JR, Heeren T. Commercial discharge packs and breastfeeding counseling: effects on infant-feeding practices in a randomized trial. *Pediatrics* 1987;80(6):845-54.
27. Serafino-Cross P, Donovan P. Effectiveness of professional breastfeeding home support. *J Nutr Educ* 1992;24(3):117-22.
28. Jones D, West R. Lactation nurse increases duration of breastfeeding. *Arch Dis Child* 1985;60:772-4.
29. Caulfield LE, Gross SM, Bentley ME, Bronner Y, Kessler L, Jensen J, et al. WIC-based interventions to promote breastfeeding among African-American Women in Baltimore: effects on breastfeeding initiation and continuation. *J Hum Lact* 1998;14(1):15-22.
30. Schafer E, Vogel MK, Viegas S, Hausafus C. Volunteer peer counselors increase breastfeeding duration among rural low-income women. *Birth* 1998;25:101-6.
31. Kistin N, Abramson R, Dublin P. Effect of peer counselors on breastfeeding initiation, exclusivity, and duration among low-income urban women. *J Hum Lact* 1994;10(1):11-5.
32. McInnes R, Love J, Stone D. Evaluation of a community-based intervention to increase breastfeeding prevalence. *J Hum Lact* 2000;22:138-45.
33. Curro V, Lanni R, Scipione F, Grimaldi V, Mastroiacovo P. Randomised controlled trial assessing the effectiveness of a booklet on the duration of breastfeeding. *Arch Dis Child* 1997;76(6):500-3.
34. Kaplowitz DD, Olson CM. The effect of an educational program on the decision to breastfeed. *J Nutr Educ* 1983;15:61-5.
35. Loh NR, Kelleher CC, Long S, Loftus BG. Can we increase breast feeding rates? *Ir Med J* 1997;90(3):100-1.
36. Grossman LK, Harter C, Sachs L, Kay A. The effect of postpartum lactation counseling on the duration of breastfeeding in low-income women. *Am J Dis Child* 1990;144(4):471-4.
37. Donnelly A, Snowden H, Renfrew M, Woolridge M. Commercial hospital discharge packs for breastfeeding women [étude Cochrane]. Dans : *The Cochrane Library*; Issue 3, 2001. Oxford: Update Software.
38. Winikoff B, Myers D, Laukaran VH, Stone R. Overcoming obstacles to breastfeeding in a large municipal hospital: applications of lessons learned. *Pediatrics* 1987;80(3):423-3.
39. De Chateau P, Wiberg B. Long-term effect on mother-infant behaviour of extra contact during the first hour post partum. II. A follow-up at three months. *Acta Paediatr Scand* 1977;66:145-51.
40. Salariya E, Easton P, Cater J. Duration of breastfeeding after early initiation and frequent feeding. *Lancet* 1978;2:1141-3.
41. Thomson M, Hartsock T, Larson C. The importance of immediate postnatal contact: its effect on breastfeeding. *Le médecin de famille canadien* 1979;25:1374-8.
42. Taylor PM, Maloni JA, Taylor FH, Campbell SB. Extra early mother-infant contact and duration of breast-feeding. *Acta Paediatr Scand Suppl* 1985;316:15-22.
43. *La nutrition du nourrisson né à terme et en santé. Énoncé du Groupe de travail mixte : Société canadienne de pédiatrie, Les diététistes du Canada, Santé Canada*. Ottawa :

ministre de la Santé; 1998. Disponible à : [www.hc-sc.gc.ca/dca-dea/publications/pdf/infant\\_f.pdf](http://www.hc-sc.gc.ca/dca-dea/publications/pdf/infant_f.pdf) (consulté le 16 février 2004).

44. American Academy of Pediatrics, Work Group on Breastfeeding. Breastfeeding and the use of human milk. *Pediatrics* 1997;100(6):1035-9. Disponible à : [aappolicy.aappublications.org/cgi/content/full/pediatrics%3b100/6/1035](http://aappolicy.aappublications.org/cgi/content/full/pediatrics%3b100/6/1035) (consulté le 16 février 2004).
45. Harris RP, Helfand M, Woolf SH, Lohr KN, Mulrow CD, Teutsch SM, et al. Current methods of the US Preventive Services Task Force. *Am J Prev Med* 2001;20(3 Suppl):21-35.

---

**Correspondance :** Groupe d'étude canadien sur les soins de santé préventifs, 117-700 Collip Circle, London (Ont.) N6G 4X8; téléc. 519 858-5112; [ctf@ctfphc.org](mailto:ctf@ctfphc.org)

---

**Les membres du Groupe d'étude canadien sur les soins de santé préventifs**

**Président :** D<sup>r</sup> John W. Feightner, professeur, Département de médecine familiale, Université Western Ontario, London (Ont.).

**Vice-présidente :** D<sup>r</sup> Harriet MacMillan, professeure agrégée, Départements de psychiatrie et neurosciences du comportement

et de pédiatrie, Centre canadien d'études de l'enfance à risque, Université McMaster, Hamilton (Ont.). **Membres :** D<sup>rs</sup> Paul Bessette, professeur titulaire, Département d'obstétrique-gynécologie, Université de Sherbrooke, Sherbrooke (Qué.); R. Wayne Elford, professeur émérite, Département de médecine familiale, Université de Calgary, Calgary (Alb.); Denice Feig, professeure adjointe, Département de médecine, Université de Toronto, Toronto (Ont.); Joanne M. Langley, professeure agrégée, Départements de pédiatrie et de santé communautaire et d'épidémiologie, Université Dalhousie, Halifax (N.-É.); Valerie Palda, professeure agrégée, Département de médecine, Université de Toronto, Toronto (Ont.); Christopher Patterson, professeur et directeur, Division de la médecine gériatrique, Département de médecine, Université McMaster, Hamilton (Ont.); et Bruce A. Reeder, professeur, Département de santé communautaire et d'épidémiologie, Université de la Saskatchewan, Saskatoon (Sask.). **Personnes-ressources :** Nadine Wathen, coordonnatrice; Ruth Walton, agrégée de recherche; Jana Fear, agrégée de recherche, Groupe d'étude canadien sur les soins de santé préventifs, Département de médecine familiale, Université Western Ontario, London (Ont.)
